# Supplementary material
Source: MDPI journal article supplement (https://www.mdpi.com/2073-4352/2/3/958)
Supplement: s1 [file s1]

data_gx511
 
_publ_contact_author_name         'Thomas M. Klap\"otke'
_publ_contact_author_address
;
 Department of Chemistry
 Ludwig Maximilian University
 Butenandtstra\&se 5--13 (D)
 81377 Munich
 Germany
;

_publ_contact_author_email        tmk@cup.uni-muenchen.de
_publ_contact_author_fax          '+49-89-2180-77491'
_publ_contact_author_phone        '+49-89-2180-77492'

loop_
 _publ_author_name		
 _publ_author_address
 'Joas, Manuel'
;
 Department of Chemistry
 Ludwig Maximilian University
 Butenandtstra\&se 5--13 (D)
 81377 Munich
 Germany
;
 'Klap\"otke, Thomas M.'
;
 Department of Chemistry
 Ludwig Maximilian University
 Butenandtstra\&se 5--13 (D)
 81377 Munich
 Germany
;

_publ_requested_journal           ?
_publ_section_title               ?
_publ_section_abstract            ?
_publ_section_comment             ?
 
_audit_author_name                'Joas, Manuel'
_audit_creation_date              'Thu Sep 01 14:14:39 2011'
_audit_creation_method            SHELXL-97

_chemical_name_systematic
'Diaqua(\m-5,5'-bistetrazolato-\k^4^N^1^,N^2^,N^5^,N^6^)copper(II)'
_chemical_name_common             'CuBT * 2 H~2~O'
_chemical_melting_point           ?
_chemical_formula_moiety          'C2 H4 Cu N8 O2'
_chemical_formula_sum		  'C2 H4 Cu N8 O2'
_chemical_formula_weight          235.68
 
loop_
 _atom_type_symbol
 _atom_type_description
 _atom_type_scat_dispersion_real
 _atom_type_scat_dispersion_imag
 _atom_type_scat_source
 'C'  'C'   0.0033   0.0016
 'International Tables Vol C Tables 4.2.6.8 and 6.1.1.4'
 'H'  'H'   0.0000   0.0000
 'International Tables Vol C Tables 4.2.6.8 and 6.1.1.4'
 'N'  'N'   0.0061   0.0033
 'International Tables Vol C Tables 4.2.6.8 and 6.1.1.4'
 'O'  'O'   0.0106   0.0060
 'International Tables Vol C Tables 4.2.6.8 and 6.1.1.4'
 'Cu'  'Cu'   0.3201   1.2651
 'International Tables Vol C Tables 4.2.6.8 and 6.1.1.4'
 
_symmetry_cell_setting            'triclinic'
_symmetry_space_group_name_H-M    'P -1'
_symmetry_int_tables_number	  2
_symmetry_space_group_name_Hall   '-P 1'
 
loop_
 _symmetry_equiv_pos_as_xyz
 'x, y, z'
 '-x, -y, -z'
 
_cell_length_a                    7.4137(13)
_cell_length_b                    7.4890(13)
_cell_length_c                    7.5391(14)
_cell_angle_alpha                 118.928(19)
_cell_angle_beta                  109.295(17)
_cell_angle_gamma                 92.470(14)
_cell_volume                      335.18(13)
_cell_formula_units_Z             2
_cell_measurement_temperature     173(2)
_cell_measurement_reflns_used     1168
_cell_measurement_theta_min       4.7530
_cell_measurement_theta_max       32.3169
 
_exptl_crystal_description        'block'
_exptl_crystal_colour             'blue'
_exptl_crystal_size_max           0.20
_exptl_crystal_size_mid           0.18
_exptl_crystal_size_min           0.14
_exptl_crystal_density_meas       ?
_exptl_crystal_density_diffrn     2.335
_exptl_crystal_density_method     'not measured'
_exptl_crystal_F_000              234
_exptl_absorpt_coefficient_mu     3.238
_exptl_absorpt_correction_type    'multi-scan'
_exptl_absorpt_correction_T_min   0.5636
_exptl_absorpt_correction_T_max   0.6599
_exptl_absorpt_process_details    
'SCALE3 ABSPACK in CrysAlisPro 1.171.35.11 (Agilent Technologies, 2011)'
 
_diffrn_ambient_temperature       173(2)
_diffrn_radiation_wavelength      0.71073
_diffrn_radiation_type            MoK\a
_diffrn_radiation_source          'fine-focus sealed tube'
_diffrn_radiation_monochromator   graphite
_diffrn_measurement_device_type   'Oxford Diffraction Xcalibur 3 CCD'
_diffrn_measurement_method        '\w scans'
_diffrn_detector_area_resol_mean  15.9809
_diffrn_standards_number          ?
_diffrn_standards_interval_count  ?
_diffrn_standards_interval_time   ?
_diffrn_standards_decay_%         ?
_diffrn_reflns_number             3451
_diffrn_reflns_av_R_equivalents   0.0713
_diffrn_reflns_av_sigmaI/netI     0.0744
_diffrn_reflns_limit_h_min        -9
_diffrn_reflns_limit_h_max        9
_diffrn_reflns_limit_k_min        -9
_diffrn_reflns_limit_k_max        9
_diffrn_reflns_limit_l_min        -9
_diffrn_reflns_limit_l_max        9
_diffrn_reflns_theta_min          4.76
_diffrn_reflns_theta_max          26.24
_reflns_number_total              1342
_reflns_number_gt                 1153
_reflns_threshold_expression      >2\s(I)
 
_computing_data_collection
 'CrysAlisPro 1.171.35.11 (Agilent Technologies, 2011)'
_computing_cell_refinement
 'CrysAlisPro 1.171.35.11 (Agilent Technologies, 2011)'
_computing_data_reduction
 'CrysAlisPro 1.171.35.11 (Agilent Technologies, 2011)'
_computing_structure_solution     'SIR92 (Altomare <i>et al.</i>, 1992)'
_computing_structure_refinement   'SHELXL-97 (Sheldrick, 2008)'
 
_refine_special_details
;
 Refinement of F^2^ against ALL reflections.  The weighted R-factor wR and
 goodness of fit S are based on F^2^, conventional R-factors R are based
 on F, with F set to zero for negative F^2^. The threshold expression of
 F^2^ > 2\s(F^2^) is used only for calculating R-factors(gt) etc. and is
 not relevant to the choice of reflections for refinement.  R-factors based
 on F^2^ are statistically about twice as large as those based on F, and R-
 factors based on ALL data will be even larger.
;
 
_refine_ls_structure_factor_coef  Fsqd
_refine_ls_matrix_type            full
_refine_ls_weighting_scheme       calc
_refine_ls_weighting_details
 'calc w=1/[\s^2^(Fo^2^)+(0.0546P)^2^+0.1196P] where P=(Fo^2^+2Fc^2^)/3'
_atom_sites_solution_primary      direct
_atom_sites_solution_secondary    difmap
_atom_sites_solution_hydrogens    geom
_refine_ls_hydrogen_treatment     refall
_refine_ls_extinction_method      none
_refine_ls_extinction_coef        ?
_refine_ls_number_reflns          1342
_refine_ls_number_parameters      134
_refine_ls_number_restraints      4
_refine_ls_R_factor_all           0.0536
_refine_ls_R_factor_gt            0.0448
_refine_ls_wR_factor_ref          0.1158
_refine_ls_wR_factor_gt           0.1098
_refine_ls_goodness_of_fit_ref    1.090
_refine_ls_restrained_S_all       1.088
_refine_ls_shift/su_max           0.000
_refine_ls_shift/su_mean          0.000
 
loop_
 _atom_site_label
 _atom_site_type_symbol
 _atom_site_fract_x
 _atom_site_fract_y
 _atom_site_fract_z
 _atom_site_U_iso_or_equiv
 _atom_site_adp_type
 _atom_site_occupancy
 _atom_site_symmetry_multiplicity
 _atom_site_calc_flag
 _atom_site_refinement_flags
 _atom_site_disorder_assembly
 _atom_site_disorder_group
Cu1 Cu 0.80990(8) 0.04593(9) 0.26970(8) 0.0115(2) Uani 1 1 d . . .
O1 O 0.8057(5) 0.3008(5) 0.5295(5) 0.0157(7) Uani 1 1 d D . .
O2 O 0.8037(6) -0.2125(6) 0.0115(6) 0.0194(8) Uani 1 1 d D . .
N7 N 0.1444(6) -0.3696(7) -0.1527(6) 0.0144(9) Uani 1 1 d . . .
N4 N 0.5590(6) -0.3137(7) 0.4468(6) 0.0146(9) Uani 1 1 d . . .
N8 N 0.2427(6) -0.4172(6) -0.0028(6) 0.0145(9) Uani 1 1 d . . .
N2 N 0.8560(5) -0.1418(6) 0.5615(6) 0.0101(8) Uani 1 1 d . . .
N5 N 0.4063(6) -0.1087(7) 0.0839(6) 0.0161(9) Uani 1 1 d . . .
N6 N 0.2413(5) -0.1874(6) -0.0982(6) 0.0127(8) Uani 1 1 d . . .
N3 N 0.7466(6) -0.2514(7) 0.5968(7) 0.0160(9) Uani 1 1 d . . .
N1 N 0.7491(6) -0.1252(6) 0.3938(6) 0.0132(8) Uani 1 1 d . . .
C2 C 0.4023(6) -0.2532(7) 0.1397(7) 0.0113(9) Uani 1 1 d . . .
C1 C 0.5663(7) -0.2339(8) 0.3257(8) 0.0138(10) Uani 1 1 d . . .
H1A H 0.899(6) 0.421(5) 0.603(8) 0.018(14) Uiso 1 1 d D . .
H1B H 0.691(6) 0.336(12) 0.494(12) 0.06(2) Uiso 1 1 d D . .
H2B H 0.792(8) -0.333(5) 0.009(9) 0.025(16) Uiso 1 1 d D . .
H2A H 0.780(9) -0.211(11) -0.112(6) 0.039(18) Uiso 1 1 d D . .
 
loop_
 _atom_site_aniso_label
 _atom_site_aniso_U_11
 _atom_site_aniso_U_22
 _atom_site_aniso_U_33
 _atom_site_aniso_U_23
 _atom_site_aniso_U_13
 _atom_site_aniso_U_12
Cu1 0.0117(3) 0.0126(4) 0.0099(3) 0.0074(3) 0.0019(2) 0.0023(2)
O1 0.0138(18) 0.0124(19) 0.0135(17) 0.0034(14) 0.0029(14) 0.0012(14)
O2 0.039(2) 0.0142(19) 0.0124(17) 0.0096(15) 0.0137(16) 0.0100(16)
N7 0.014(2) 0.015(2) 0.0112(19) 0.0073(17) 0.0014(16) 0.0020(16)
N4 0.0104(19) 0.023(2) 0.014(2) 0.0135(18) 0.0029(16) 0.0055(16)
N8 0.012(2) 0.016(2) 0.014(2) 0.0105(18) 0.0003(16) 0.0020(16)
N2 0.0066(18) 0.018(2) 0.0121(19) 0.0126(17) 0.0030(15) 0.0065(15)
N5 0.015(2) 0.014(2) 0.0104(19) 0.0058(17) -0.0037(16) 0.0038(16)
N6 0.0113(19) 0.015(2) 0.0092(18) 0.0069(16) 0.0004(15) 0.0004(16)
N3 0.015(2) 0.021(2) 0.015(2) 0.0132(18) 0.0038(16) 0.0055(17)
N1 0.0103(19) 0.016(2) 0.0099(19) 0.0062(17) 0.0013(15) 0.0031(16)
C2 0.011(2) 0.016(3) 0.010(2) 0.0091(19) 0.0037(18) 0.0044(18)
C1 0.013(2) 0.015(3) 0.015(2) 0.008(2) 0.0068(19) 0.0047(19)
 
_geom_special_details
;
 All s.u.'s (except the s.u. in the dihedral angle between two l.s. planes)
 are estimated using the full covariance matrix.  The cell s.u.'s are taken
 into account individually in the estimation of s.u.'s in distances, angles
 and torsion angles; correlations between s.u.'s in cell parameters are only
 used when they are defined by crystal symmetry.  An approximate (isotropic)
 treatment of cell s.u.'s is used for estimating s.u.'s involving l.s. planes.
;
 
loop_
 _geom_bond_atom_site_label_1
 _geom_bond_atom_site_label_2
 _geom_bond_distance
 _geom_bond_site_symmetry_2
 _geom_bond_publ_flag
Cu1 O2 1.956(4) . ?
Cu1 O1 1.977(3) . ?
Cu1 N6 1.994(4) 2_655 ?
Cu1 N1 2.027(4) . ?
Cu1 N2 2.269(4) 2_756 ?
O1 H1A 0.896(10) . ?
O1 H1B 0.894(10) . ?
O2 H2B 0.897(10) . ?
O2 H2A 0.896(10) . ?
N7 N6 1.314(6) . ?
N7 N8 1.343(5) . ?
N4 C1 1.323(6) . ?
N4 N3 1.351(5) . ?
N8 C2 1.349(6) . ?
N2 N3 1.304(6) . ?
N2 N1 1.319(5) . ?
N2 Cu1 2.269(4) 2_756 ?
N5 N6 1.332(5) . ?
N5 C2 1.339(6) . ?
N6 Cu1 1.994(4) 2_655 ?
N1 C1 1.343(6) . ?
C2 C1 1.459(6) . ?
 
loop_
 _geom_angle_atom_site_label_1
 _geom_angle_atom_site_label_2
 _geom_angle_atom_site_label_3
 _geom_angle
 _geom_angle_site_symmetry_1
 _geom_angle_site_symmetry_3
 _geom_angle_publ_flag
O2 Cu1 O1 177.54(14) . . ?
O2 Cu1 N6 90.33(16) . 2_655 ?
O1 Cu1 N6 90.64(16) . 2_655 ?
O2 Cu1 N1 89.50(15) . . ?
O1 Cu1 N1 88.76(15) . . ?
N6 Cu1 N1 158.24(16) 2_655 . ?
O2 Cu1 N2 93.77(15) . 2_756 ?
O1 Cu1 N2 88.24(14) . 2_756 ?
N6 Cu1 N2 101.63(14) 2_655 2_756 ?
N1 Cu1 N2 100.10(14) . 2_756 ?
Cu1 O1 H1A 121(4) . . ?
Cu1 O1 H1B 111(5) . . ?
H1A O1 H1B 105(6) . . ?
Cu1 O2 H2B 119(4) . . ?
Cu1 O2 H2A 117(4) . . ?
H2B O2 H2A 122(6) . . ?
N6 N7 N8 108.9(4) . . ?
C1 N4 N3 104.1(4) . . ?
N7 N8 C2 103.8(4) . . ?
N3 N2 N1 110.6(4) . . ?
N3 N2 Cu1 123.0(3) . 2_756 ?
N1 N2 Cu1 125.6(3) . 2_756 ?
N6 N5 C2 103.1(4) . . ?
N7 N6 N5 111.5(4) . . ?
N7 N6 Cu1 128.6(3) . 2_655 ?
N5 N6 Cu1 119.4(3) . 2_655 ?
N2 N3 N4 109.1(4) . . ?
N2 N1 C1 104.2(4) . . ?
N2 N1 Cu1 132.6(3) . . ?
C1 N1 Cu1 122.8(3) . . ?
N5 C2 N8 112.7(4) . . ?
N5 C2 C1 120.9(4) . . ?
N8 C2 C1 126.2(4) . . ?
N4 C1 N1 112.0(4) . . ?
N4 C1 C2 126.9(4) . . ?
N1 C1 C2 121.1(4) . . ?
 
loop_
 _geom_torsion_atom_site_label_1
 _geom_torsion_atom_site_label_2
 _geom_torsion_atom_site_label_3
 _geom_torsion_atom_site_label_4
 _geom_torsion
 _geom_torsion_site_symmetry_1
 _geom_torsion_site_symmetry_2
 _geom_torsion_site_symmetry_3
 _geom_torsion_site_symmetry_4
 _geom_torsion_publ_flag
N6 N7 N8 C2 -0.5(5) . . . . ?
N8 N7 N6 N5 1.1(5) . . . . ?
N8 N7 N6 Cu1 172.3(3) . . . 2_655 ?
C2 N5 N6 N7 -1.1(5) . . . . ?
C2 N5 N6 Cu1 -173.2(3) . . . 2_655 ?
N1 N2 N3 N4 0.6(5) . . . . ?
Cu1 N2 N3 N4 -169.7(3) 2_756 . . . ?
C1 N4 N3 N2 -0.3(5) . . . . ?
N3 N2 N1 C1 -0.7(5) . . . . ?
Cu1 N2 N1 C1 169.3(3) 2_756 . . . ?
N3 N2 N1 Cu1 171.8(3) . . . . ?
Cu1 N2 N1 Cu1 -18.3(6) 2_756 . . . ?
O2 Cu1 N1 N2 108.8(4) . . . . ?
O1 Cu1 N1 N2 -73.0(4) . . . . ?
N6 Cu1 N1 N2 -161.6(4) 2_655 . . . ?
N2 Cu1 N1 N2 15.0(5) 2_756 . . . ?
O2 Cu1 N1 C1 -80.0(4) . . . . ?
O1 Cu1 N1 C1 98.3(4) . . . . ?
N6 Cu1 N1 C1 9.6(7) 2_655 . . . ?
N2 Cu1 N1 C1 -173.7(4) 2_756 . . . ?
N6 N5 C2 N8 0.7(5) . . . . ?
N6 N5 C2 C1 175.8(4) . . . . ?
N7 N8 C2 N5 -0.1(5) . . . . ?
N7 N8 C2 C1 -175.0(4) . . . . ?
N3 N4 C1 N1 -0.1(5) . . . . ?
N3 N4 C1 C2 -179.6(4) . . . . ?
N2 N1 C1 N4 0.5(5) . . . . ?
Cu1 N1 C1 N4 -172.9(3) . . . . ?
N2 N1 C1 C2 180.0(4) . . . . ?
Cu1 N1 C1 C2 6.6(6) . . . . ?
N5 C2 C1 N4 154.5(5) . . . . ?
N8 C2 C1 N4 -31.1(8) . . . . ?
N5 C2 C1 N1 -24.9(7) . . . . ?
N8 C2 C1 N1 149.5(5) . . . . ?
 
loop_
 _geom_hbond_atom_site_label_D
 _geom_hbond_atom_site_label_H
 _geom_hbond_atom_site_label_A
 _geom_hbond_distance_DH
 _geom_hbond_distance_HA
 _geom_hbond_distance_DA
 _geom_hbond_angle_DHA
 _geom_hbond_site_symmetry_A
O1 H1A N7  0.896(10) 1.98(3) 2.812(5) 155(5) 1_666
O1 H1B N4  0.894(10) 2.06(6) 2.770(5) 135(7) 2_656
O2 H2B N8  0.897(10) 1.849(12) 2.746(5) 177(5) 2_645
O2 H2A N3  0.896(10) 1.990(17) 2.877(5) 170(6) 1_554
 
_diffrn_measured_fraction_theta_max    0.986
_diffrn_reflns_theta_full              26.24
_diffrn_measured_fraction_theta_full   0.986
_refine_diff_density_max    1.311
_refine_diff_density_min   -0.787
_refine_diff_density_rms    0.165
_iucr_refine_instructions_details
;
TITL v1 in P-1
CELL  0.71073   7.4137   7.4890   7.5391  118.928  109.295   92.470
ZERR     2.00   0.0013   0.0013   0.0014    0.019    0.017    0.014
LATT   1
SFAC  C    H    N    O    CU
UNIT  4    8    16   4    2
MERG   2
OMIT    -2.00  52.50
OMIT    -1   1   1
OMIT    -2   0   3
OMIT    -5  -3   1
OMIT     6  -3   1
OMIT     4  -1   3
OMIT     3   5   1
OMIT     2  -2   7
OMIT    -2  -1   4
OMIT     5   2   0
OMIT     2   1   5
OMIT    -2  -3   1
OMIT     3   4   2
DFIX 0.90 0.01 O1 H1a O1 H1b O2 H2a O2 H2b
EQIV $1 x+1, y+1, z+1
EQIV $2 -x+1, -y, -z+1
EQIV $3 -x+1, -y-1, -z
EQIV $4 x, y, z-1
HTAB O1 N7_$1
HTAB O1 N4_$2
HTAB O2 N8_$3
HTAB O2 N3_$4
FMAP   2
PLAN   25
SIZE     0.14   0.18   0.20
ACTA
BOND   $H
CONF
L.S.   4
TEMP  -100.00
WGHT    0.054600    0.119600
FVAR       0.59672
CU1   5    0.809905    0.045932    0.269704    11.00000    0.01174    0.01258 =
         0.00995    0.00735    0.00194    0.00232
O1    4    0.805693    0.300789    0.529490    11.00000    0.01376    0.01239 =
         0.01351    0.00345    0.00290    0.00120
O2    4    0.803733   -0.212510    0.011545    11.00000    0.03865    0.01420 =
         0.01245    0.00961    0.01371    0.00996
N7    3    0.144408   -0.369650   -0.152677    11.00000    0.01429    0.01491 =
         0.01118    0.00735    0.00143    0.00198
N4    3    0.558978   -0.313674    0.446824    11.00000    0.01037    0.02281 =
         0.01427    0.01348    0.00287    0.00555
N8    3    0.242735   -0.417196   -0.002764    11.00000    0.01199    0.01621 =
         0.01422    0.01054    0.00028    0.00200
N2    3    0.856041   -0.141761    0.561497    11.00000    0.00659    0.01804 =
         0.01207    0.01256    0.00299    0.00648
N5    3    0.406265   -0.108698    0.083931    11.00000    0.01514    0.01397 =
         0.01037    0.00584   -0.00372    0.00383
N6    3    0.241273   -0.187372   -0.098165    11.00000    0.01133    0.01475 =
         0.00919    0.00691    0.00038    0.00043
N3    3    0.746629   -0.251389    0.596809    11.00000    0.01464    0.02118 =
         0.01530    0.01316    0.00375    0.00546
N1    3    0.749122   -0.125248    0.393771    11.00000    0.01027    0.01590 =
         0.00990    0.00616    0.00126    0.00313
C2    1    0.402260   -0.253154    0.139671    11.00000    0.01090    0.01615 =
         0.00973    0.00909    0.00367    0.00441
C1    1    0.566314   -0.233935    0.325668    11.00000    0.01291    0.01479 =
         0.01468    0.00763    0.00677    0.00474
H1A   2    0.899264    0.420551    0.603451    11.00000    0.01815
H1B   2    0.691199    0.336196    0.494443    11.00000    0.05965
H2B   2    0.792307   -0.333380    0.009333    11.00000    0.02478
H2A   2    0.779699   -0.211142   -0.112239    11.00000    0.03856
HKLF    4
 
REM  v1 in P-1
REM R1 =  0.0448 for   1153 Fo > 4sig(Fo)  and  0.0536 for all   1342 data
REM    134 parameters refined using      4 restraints
 
END
 
WGHT      0.0546      0.1196
REM Highest difference peak  1.311,  deepest hole -0.787,  1-sigma level  0.165
Q1    1   0.6270 -0.0415  0.1424  11.00000  0.05    1.31
Q2    1   0.6544 -0.2488  0.4046  11.00000  0.05    1.15
Q3    1   1.0134 -0.1147  0.6243  11.00000  0.05    1.11
Q4    1   0.4900 -0.3028  0.3069  11.00000  0.05    0.87
Q5    1   0.3193 -0.3754  0.1987  11.00000  0.05    0.87
Q6    1   0.0793 -0.2440 -0.1936  11.00000  0.05    0.81
Q7    1   0.4622 -0.0961  0.0354  11.00000  0.05    0.77
Q8    1   0.5731 -0.1471  0.1834  11.00000  0.05    0.72
Q9    1   0.6987 -0.2456 -0.0611  11.00000  0.05    0.61
Q10   1   0.7246 -0.0812  0.2569  11.00000  0.05    0.59
Q11   1   0.4111 -0.1931  0.0754  11.00000  0.05    0.59
Q12   1   0.1494 -0.4518  0.0616  11.00000  0.05    0.58
Q13   1   0.7635 -0.3416  0.6190  11.00000  0.05    0.56
Q14   1   0.8626 -0.0377  0.3833  11.00000  0.05    0.56
Q15   1   0.7480 -0.1204  0.0386  11.00000  0.05    0.53
Q16   1   0.5906 -0.4362  0.4825  11.00000  0.05    0.49
Q17   1   0.8783  0.2142  0.6566  11.00000  0.05    0.46
Q18   1   0.8242 -0.1338  0.1162  11.00000  0.05    0.44
Q19   1   0.7106  0.2335  0.4267  11.00000  0.05    0.43
Q20   1   0.8608  0.2034  0.4799  11.00000  0.05    0.43
Q21   1   0.9305 -0.2777  0.7105  11.00000  0.05    0.42
Q22   1   0.5747 -0.1540  0.3358  11.00000  0.05    0.41
Q23   1   0.7316 -0.1651  0.0766  11.00000  0.05    0.41
Q24   1   0.5511 -0.3187 -0.1478  11.00000  0.05    0.40
Q25   1   0.9534 -0.0296  0.5213  11.00000  0.05    0.40
;
